1                                   **Sexual selection rewires reproductive protein networks**

2

3

4 Timothy L. Karr<sup>1,\*§</sup>, Helen Southern<sup>2</sup>, Matthew Rosenow<sup>3</sup>, Toni I. Gossmann<sup>2</sup>, and Rhonda R.  
5 Snook<sup>4,\*</sup>

6

7 <sup>1</sup>Department of Genomics and Genetic Resources, Kyoto Institute of Technology, Kyoto,  
8 Japan

9 <sup>2</sup>Department of Animal and Plant Sciences, University of Sheffield, UK.

10 <sup>3</sup>Caris Life Sciences, Phoenix, AZ

11 <sup>4</sup>Department of Zoology, Stockholm University, Sweden

12 \*Corresponding authors: Email: [tkarr@asu.edu](mailto:tkarr@asu.edu) & [rhonda.snook@zoologi.su.se](mailto:rhonda.snook@zoologi.su.se)

13 §Current address: Arizona State University, School of Life Sciences, Tempe, AZ 85287

14

15

16 Running title: Sexual selection and protein interaction networks

17 **The abbreviations used are:**

18 BLAST, Basic Local Alignment Search Tool

19 Dpse, *Drosophila pseudoobscura*

20 PCSS, postcopulatory sexual selection

21 SFPs, seminal fluid proteins

22 Dmel, *D. melanogaster*

23 SDS, sodium dodecylsulfate

- 24 SDS-PAGE, sodium dodecylsulfate polyacrylamide gel electrophoresis
- 25 MS, mass spectrometry
- 26 LC-MS/MS, liquid chromatography-MS/MS
- 27 AcgP, accessory gland proteome
- 28 FDRs, False Discovery Rates
- 29 AcgS, accessory gland secretome
- 30 exoP, exoproteome
- 31 LFQ, label-free quantitation
- 32 P, polyandry
- 33 M, monandry
- 34 GO, gene ontology
- 35 CC, cellular component
- 36 MF, molecular function
- 37 BP, biological process
- 38 STRING, Search Tool for the Retrieval of Interacting Genes/Proteins
- 39 DIOPT, DRSC Integrative Ortholog Prediction Tools
- 40 ER, endoplasmic reticulum

41 **Polyandry drives postcopulatory sexual selection (PCSS), resulting in rapid evolution**  
42 **of male ejaculate traits. Critical to male and female fitness, the ejaculate is known to**  
43 **contain rapidly evolving seminal fluid proteins (SFPs) produced by specialized male**  
44 **secretory accessory glands. The evidence that rapid evolution of some SFPs is driven**  
45 **by PCSS, however, is indirect, based on either plastic responses to changes in the**  
46 **sexual selection environment or correlative macroevolutionary patterns. Moreover,**  
47 **such studies focus on SFPs that represent but a small component of the accessory**  
48 **gland proteome. Neither how SFPs function with other reproductive proteins, nor how**  
49 **PCSS influences the underlying secretory tissue adaptations and content of the**  
50 **accessory gland, has been addressed at the level of the proteome. Here we directly test**  
51 **the hypothesis that PCSS results in rapid evolution of the entire male accessory gland**  
52 **proteome and protein networks by taking a system-level approach, combining**  
53 **divergent experimental evolution of PCSS in *Drosophila pseudoobscura* (Dpse), high**  
54 **resolution mass spectrometry (MS) and proteomic discovery, bioinformatics and**  
55 **population genetic analyses. We demonstrate that PCSS influences the abundance of**  
56 **over 200 accessory gland proteins, including SFPs. A small but significant number of**  
57 **these proteins display molecular signatures of positive selection. Divergent PCSS also**  
58 **results in fundamental and remarkably compartmentalized evolution of accessory**  
59 **gland protein networks in which males subjected to strong PCSS invest in protein**  
60 **networks that serve to increase protein production whereas males subjected to relaxed**  
61 **PCSS alters protein networks involved in protein surveillance and quality. These results**  
62 **directly demonstrate that PCSS is a key evolutionary driver that shapes not only**  
63 **individual reproductive proteins, but rewires entire reproductive protein networks.**

64 Polyandry, in which females mate with different males across a reproductive bout, generates  
65 PCSS in which ejaculates compete for fertilization of a limited supply of ova and females  
66 may choose whose sperm will fertilize those limited ova (1). Polyandry also engenders sexual  
67 conflict, in which male and female reproductive interests differ, as a consequence of the  
68 disproportionate costs and benefits of mating between the sexes (2). PCSS operates in  
69 internally fertilizing organisms between the female reproductive tract and the male ejaculate,  
70 which is composed of both sperm and non-sperm components, including SFPs (3). SFPs  
71 were first identified by their canonical signal peptide sequence that direct proteins to the  
72 secretory pathway (4). Cross-species comparative work has found that general classes of  
73 SFPs are conserved (e.g., proteases and protease inhibitors, lectins and prohormones)  
74 suggesting that their mechanisms of action are also conserved. However, individual SFPs  
75 can rapidly evolve with signals of accelerated rates of adaptive molecular evolution found in  
76 studies of coding sequence and male-biased gene expression observed across different  
77 animal taxa (e.g., mammals (5, 6); birds (7); *Drosophila* (8–10)).

78

79 Rapid evolution of SFPs is attributed to PCSS because this cocktail of proteins, transferred to  
80 females, has dramatic and sometimes antagonistic effects on male and female fitness,  
81 including increased female fecundity, reduced female receptivity, decreased female life span,  
82 and remodelling of female reproductive tract morphology (4, 11–13). Moreover, males can  
83 tailor ejaculate composition, altering the quantity of specific SFPs, via plastic changes in  
84 response to variation in the PCSS environment (5, 14) although a mechanism by which males  
85 accomplish this is unknown. However, while many studies have examined the evolution and  
86 fitness consequences of SFPs, most of them examine the impact of one or just a few of these  
87 proteins. This focus is problematic because SFPs do not work in isolation, but rather as  
88 partners in protein-protein and protein-nucleic acid networks, and not just solely with other  
89 SFPs (15, 16). Therefore, changes in either protein levels or protein function may have  
90 significant up- and/or down-stream consequences on organismal physiology and fitness.  
91 Indirect studies of the role of PCSS on reproductive protein evolution have not considered

92 other proteins also produced by male accessory gland tissue that may interact with SFPs and  
93 influence fitness.

94

95 Most of our current knowledge of SFPs comes from traditional protein detection methods and  
96 comparisons aimed at one species, *D. melanogaster* (9, 17–19). However, the advent of  
97 sophisticated transcriptomic, proteomic and bioinformatics approaches have identified new  
98 SFPs and associated reproductive proteins not only in Dmel but also other taxa (20–26).  
99 Furthermore, high throughput mass spectrometry based techniques now routinely produce  
100 cellular and tissue proteomes consisting of thousands of protein IDs not only useful for protein  
101 identification but also the analysis and identification of protein interaction networks.

102

103 Initial application using these techniques to the analysis of the sperm proteome (24, 25) found  
104 heterogeneity in the evolutionary rates of genes compared to SFPs which lead to the  
105 hypothesis that adaptive compartmentalization can occur both within and between proteomes  
106 involved in reproduction. This hypothesis suggests that interacting reproductive proteins would  
107 comprise a set of “core” proteins with essential cellular functions (e.g., sperm motility) that are  
108 predicted to be under strong purifying selection and another set of proteins under adaptive  
109 selection generated from PCSS, e.g., sperm-egg interactions (24). Other than sperm, direct  
110 empirical confirmation of adaptive compartmentalization, and a possible role of PCSS in this  
111 process, has yet to be undertaken. Likewise, application of high throughput mass spectrometry  
112 based techniques have allowed characterization and dynamics of protein interaction networks  
113 in a variety of cellular contexts including disease-induced perturbation and or over evolutionary  
114 time frames (see (27, 28) for recent reviews). However, the role of PCSS in shaping the  
115 architecture of protein interaction networks is unknown.

116

117 Here we address the overall qualitative and quantitative impact of PCSS on the male  
118 accessory gland proteome and directly test the hypothesis that PCSS effects SFP production  
119 and their reproductive protein networks. We also test for signatures of positive selection and

120 examine evidence for adaptive compartmentalization. We perform these tests using replicated  
121 experimentally evolved lines of *D. pseudoobscura* (Dpse) in which PCSS was manipulated  
122 over many generations by either allowing polyandry (“P” lines; 1 female with 6 males) or  
123 enforcing monogamy (“M” lines; 1 female with 1 male) (29). Previous studies using these lines  
124 have found that divergent sexual selection impacts the evolution of reproductive traits relevant  
125 to PCSS and SFP production, including P males altering female investment in both early and  
126 total progeny production (30) and P males having larger accessory glands that resulted in  
127 greater reproductive success (31). Sex-biased gene expression has also evolved in these  
128 lines (32, 33), and, taken together these results strongly motivate using these lines to directly  
129 test the role of PCSS in shaping male reproductive proteomes at the microevolutionary scale.

130

## 131 EXPERIMENTAL PROCEDURES

132 *Experimental lines.* The establishment and maintenance of the selection lines were previously  
133 described in detail (29) Briefly, an ancestral wild-caught population of Dpse from Tucson  
134 Arizona USA, a naturally polyandrous species (wild caught females have been shown to be  
135 frequently inseminated by at least two males at any given time; (34)), was used to establish  
136 the selection lines. From this population, four replicate lines (replicates 1-4) of two different  
137 sexual selection treatments were established. To modify the opportunity for sexual selection,  
138 adult sex ratio in vials was manipulated by either confining one female with a single male and  
139 enforcing monogamy (“monogamy” treatment, M) or one female with six males promoting  
140 polyandry (“polyandry” treatment, P (NB: this treatment has also been referred to as E in other  
141 publications). Effective population sizes are equalized between the treatments as described  
142 previously (35). At each generation, offspring are collected and pooled together for each  
143 replicate line, and a random sample from this pool is used to constitute the next generation in  
144 the appropriate sex ratios, thus proportionally reflecting the differential offspring production  
145 across families. In total, eight selection lines (M1, M2, M3, M4 and P1, P2, P3, P4) are  
146 maintained, in standard vials (2.5 × 80 mm), with a generation time of 28 days. All populations  
147 are kept at 22°C on a 12L:12D cycle, with standard food media and added live yeast.

148

149 *Experimental flies.* Flies from replicates 1-4 of each of the selection lines were collected from  
150 generations 157, 156, 155 and 153 respectively. We standardized for maternal and larval  
151 environments (29), but in brief, parental flies were collected and housed en-mass in food  
152 bottles, then groups of about 30 were transferred on egg laying plates for 24 hours, removed  
153 and replaced with a fresh egg plate. This second plate was removed after 24 hours, then 48  
154 hours later, first instar larvae were collected in groups of 100 and housed in standard  
155 molasses/agar food vials at 22°C. Males from these vials were collected on the day of eclosion  
156 and housed in vials of 10 individuals, until they were sexually mature (36), and then dissected  
157 when they were 5 or 6 days old.

158

159 *Accessory gland tissue preparation.* For dissections, males were anaesthetized with ether,  
160 placed in a drop of phosphate buffered saline and the reproductive tract removed. Intact  
161 accessory glands were clipped from the rest of the reproductive tract (Supplemental Figure  
162 1A, B) with fine dissection needles, moved to another drop of phosphate buffered saline for  
163 rinsing, and then transferred to a microcentrifuge tube. 30 accessory glands per replicate were  
164 used for subsequent LC-MS/MS as described below. Samples from each replicate were  
165 solubilized at 4°C by addition of 30 µl of RIPA buffer (Sigma), and a HALT protease inhibitor  
166 mixture containing phenylmethylsulfonyl fluoride (Thermo Fisher Scientific). Once all  
167 accessory glands had been dissected, samples were freeze/thawed three times on dry ice (~5  
168 mins) and then thawed at 37°C for 30 seconds. After the freeze/thaw cycles, samples were  
169 vortexed for 30 seconds, centrifuged at 20,000 rpm for 5 minutes at 4°C and then stored at -  
170 80°C until processing.

171

172 *Sodium dodecylsulfate polyacrylamide gel electrophoresis (SDS-PAGE) and in-gel digestion*  
173 *of proteins.* Protein concentration was determined using a Bradford assay and samples were  
174 solubilized in SDS sample buffer containing 10 mM dithiothreitol and proteins separated on 4-  
175 12% SDS-PAGE gels per manufacturer instructions (Invitrogen). Protein bands were

176 visualized (Supplemental Figure 1C) using Brilliant Blue G Colloidal Concentrate (Sigma).  
177 Each gel lane was manually cut into approximately equivalent sized pieces and destained  
178 using 200 mM ammonium bicarbonate and 40% acetonitrile. Gel pieces were then reduced in  
179 200  $\mu$ l of a 50 mM ammonium bicarbonate buffer containing 10 mM dithiothreitol, followed by  
180 alkylation in a similar volume of a 50 mM ammonium bicarbonate containing 55 mM  
181 iodoacetamide. Gel pieces were then centrifuged at 13 Kg for 10 seconds and dried using a  
182 vacuum concentrator until all samples were dry (~30 min). The dried pieces were then  
183 hydrated in a solution containing 20  $\mu$ l of trypsin (New England BioLabs) and 50  $\mu$ l of  
184 acetonitrile and incubated overnight at 37°C. Peptides were extracted the following day using  
185 a standard method with a solution of 100% acetonitrile and 5% formic acid and dried down  
186 overnight in a vacuum concentrator at 30°C. Resulting peptides were resuspended in 7.5  $\mu$ l  
187 of 0.1% (v/v) formic acid, 3% (v/v) acetonitrile, sonicated in a water bath for 5 minutes and  
188 centrifuged at 13 x g for 10 seconds, before being transferred to a sample vial and loaded into  
189 the autosampler tray of the Dionex Ultimate 3000  $\mu$ HPLC system. Samples were set to run  
190 using the Xcalibur sequence system.

191

192 *Liquid chromatography-MS/MS (LC-MS/MS) data collection.* All MS data were collected using  
193 an LTQ Orbitrap Elite hybrid mass spectrometer (Thermo Fisher Scientific) equipped with an  
194 Easy-Spray (Thermo Fisher Scientific) ion source. Peptides were separated using an Ultimate  
195 3000 Nano LC System (Dionex). Peptides were desalted on-line using a capillary trap column  
196 (Acclaim Pepmap100, 100  $\mu$ m, 75  $\mu$ m x 2 cm, C18, 5  $\mu$ m; Thermo Fisher Scientific) and then  
197 separated using 60 min reverse phase gradient (3-40% acetonitrile/0.1% formic acid) on an  
198 Acclaim PepMap100 RSLC C18 analytical column (2  $\mu$ m, 75  $\mu$ m id x 10 cm; Thermo Fisher  
199 Scientific) with a flow rate of 0.25  $\mu$ l/min. The mass spectrometer was operated in standard  
200 data dependent acquisition mode controlled by Xcalibur 2.2. The instrument was operated  
201 with a cycle of one MS (in the Orbitrap) acquired at a resolution of 60,000 at m/z 400, with the  
202 top 20 most abundant multiply-charged (2+ and higher) ions in a given chromatographic  
203 window further subjected to CID fragmentation in the linear ion trap. An FTMS target value of



204 1e6 and an ion trap MSn target value of 10000 were used. Dynamic exclusion was enabled  
205 with a repeat duration of 30 s with an exclusion list of 500 and exclusion duration of 30 s.

### 206 *Experimental Design and Statistical Rationale*

207 *Database construction of the Dpse accessory gland proteome (AcgP).* The mass spectra data  
208 files were searched individually using Sequest HT within the Proteome Discover suite (Thermo  
209 Fisher Scientific, San Jose, CA, USA; version 1.4.1.14) using *Drosophila pseudoobscura*  
210 *pseudoobscura* fasta file, (December, 2015 release). Peptide matches were further analyzed  
211 and validated within Scaffold Q+ (Proteome Software; version 3.2.0) using X!Tandem.  
212 Sequest HT and X!Tandem searches were set with a fragment ion mass tolerance of 0.60 Da  
213 and a parent ion tolerance of 10.0 parts per million. The oxidation of methionine (15.99),  
214 carboxyamidomethyl of cysteine (57.02), and acetyl modification on peptide N-terminus  
215 (42.01) were set as variable modifications. Files from Sequest HT searches within the same  
216 gel lane were merged together as Mudpit using Scaffold which calculated False Discovery  
217 Rates (FDRs) using a reverse concatenated decoy database (FDR was set at 1.0%). Peptide  
218 identifications were accepted if they could be established at greater than 95.0% probability as  
219 specified by the PeptideProphet<sup>48</sup> and protein identifications were accepted if they could be  
220 established at greater than 99.0% probability and contained at least 2 identified peptides.  
221 Protein probabilities were assigned by the Protein Prophet Algorithm (37). Proteins that  
222 contained similar peptides and could not be differentiated based on MS/MS analysis alone  
223 were grouped to satisfy the principles of parsimony. The dataset was filtered so that every  
224 protein must be identified by at least two unique peptides in any one of the biological replicates.  
225 Although a conservative approach, this procedure ensured a robust dataset devoid of potential  
226 misidentifications often caused by use of a single peptide for protein identification. To establish  
227 a working list of the AcgP, protein IDs from Scaffold were converted to Dpse Fly Base gene  
228 numbers (FBgns) using the Uniprot website (Uniprot.org). The resulting Dpse FBgns were  
229 then used to query Flybase (Flybase.org) to retrieve orthologous Dmel genes from the  
230 OrthoDB orthology tables as implemented in Flybase (38). A complete listing can be found in  
231 Supplemental Table 1.

232

233 *Database construction of the Dpse accessory gland secretome (AcgS) and exoproteome*  
234 (*exoP*). As a secretory organ, the accessory gland is expected to contain the cellular  
235 machinery necessary for efficient and sustained secretory activity throughout the adult  
236 reproductive life cycle. To examine and focus on potential activities related to secretion, we  
237 assembled an *in silico* AcgS from the 3281 FBgns of the AcgP as input into Uniprot resulting  
238 in 5624 UniProtKB IDs (which includes all predicted protein isoforms). Fasta protein sequence  
239 files from each Uniprot entry were downloaded and input into SignalP  
240 (<http://www.cbs.dtu.dk/services/SignalP/>) (39) and Phobius (<http://phobius.sbc.su.se>) (40),  
241 using default settings. The protein IDs were combined, exported into Excel, yielding a final list  
242 of 771 UniProt identifiers. The Uniprot IDs were mapped back to 535 unique Dpse FBgns (via  
243 Uniprot) which, after submission to OrthoDB (via Flybase) resulted in a final list and 506 Dmel  
244 orthologs. Candidate SFPs were identified by first querying the list of 515 AcgS genes in  
245 Flybase for Gene Ontology (GO) terms containing “extracellular”. The resulting list of 151  
246 proteins therefore represents the accessory gland exoproteome (*exoP*) and is considered to  
247 contain a representative sampling of a major fraction of SFPs.

248

249 *Network and protein interaction network analyses.* The finalized datasets were used for  
250 downstream bioinformatic analyses and subsequent visualizations of GO enrichment. The  
251 protein coding sequences of the AcgP were downloaded from Uniprot and submitted to  
252 Blast2go for annotation and tabulation of the three major GO categories, biological process  
253 (BP), molecular function (MF) and cellular component (CC). GO enrichment and network  
254 visualization and analysis was performed with Cytoscape v3.4 (41, 42) and ClueGO plugin  
255 version 2.2.4 (43, 44). Network parameters used were specific for each dataset as detailed in  
256 figure legends and supplemental tables. Protein interaction network analysis was performed  
257 using Search Tool for the Retrieval of Interacting Genes/Proteins (STRING), a program that  
258 calculates the degree of protein-protein network interconnectivity (45). A combined set of

259 differentially abundant proteins from each M- and P-line (Qspec, see next section below) was  
260 uploaded to the STRING website and the analysis run using the “high confidence 0.9” setting  
261 and the “experimental” and “databases” selected for “evidence”. Proteins in each M- and P-  
262 up groups were distinguished by color-code: red (M>P) and green (P>M).

263

264 *Label-free quantitation and statistical analysis.* To test for differential abundance of male  
265 reproductive proteins in response to postcopulatory sexual selection statistical significance  
266 was calculated using a Bayesian approach as implemented by Qspec (46), part of the  
267 statistical package Qprot (47). Qspec provides a statistics framework that calculates Bayes  
268 factors- essentially likelihood measures of significance in the context of a generalized linear  
269 mixed effects model. Local implementation of Qprot (<http://sourceforge.net/p/qprot/>) provided  
270 command line access to QSpec that calculated Z-statistics, log-fold change estimates and a  
271 local FDR for each pair-wise comparison. This approach has been shown effective in capturing  
272 a broad range of differentially abundant proteins using LFQ methods (46, 48). Raw spectral  
273 counts of the M and P line datasets from Scaffold were input into Qspec and the output  
274 imported into Excel. Differential protein abundance differences were calculated using a 1%  
275 false-discovery rate (FDR) cut-off, and proteins assigned based on log-fold changes relative  
276 to the M-line, i.e., positive fold-change,  $M < P$ ; negative fold-change,  $M > P$ .

277

278 *Molecular evolution parameters.* We obtained coding sequence information for the genomes  
279 of the two close relatives of Dpse, *D. lowei* and *D. affinis*, downloaded from  
280 [http://popoolation.at/lowei\\_genome](http://popoolation.at/lowei_genome) and [http://popoolation.at/affinis\\_genome](http://popoolation.at/affinis_genome) (49). These two  
281 species have the same karyotype as Dpse and show reasonable divergence (median pairwise  
282  $dS=0.102$  versus *D. lowei* and  $dS=0.26$  versus *D. affinis*) thus avoiding substitution rate  
283 saturation. To identify orthologs of the identified AcgP Dpse proteins in the two other  
284 Drosophila genomes we combined two approaches. First we used gene annotation ignoring  
285 isoforms specification (as these are difficult to identify within a proteomic screen). We then

286 used best BLAST hits (50) of the *Dpse* gene against each of the two other genomes, but  
287 excluded gene sets for which annotation was contradictory to the *Dpse* annotation. Using a  
288 pipeline we developed earlier (51), sequences were aligned using MUSCLE (52), uncertain  
289 sequences filtered out using ZORRO (53) and input files converted with pal2nal (54).  
290 Sequences were then analyzed using PAML v4.9 (55) to obtain dN/dS values for each gene  
291 set (one-ratio estimates) as well as to conduct direct tests of positive selection as implemented  
292 in the site-specific models models M7a and M8a. For the one-ratio estimates, median  
293 differences in dN, dS and dN/dS among groups (AcgP, AcgS, exoP and differentially abundant  
294 M and P proteins) were tested using a non-parametric two-tailed test (57). For the site tests of  
295 positive selection, we obtained significance by conducting LRTs as described in the PAML  
296 manual and corrected P-values for multiple testing using an FDR=0.1 using the method of  
297 Benjamini and Hochberg (56). Median differences in dN, dS and dN/dS among groups (AcgP,  
298 AcgS, ExoP and differentially abundant M and P proteins) were tested using a non-parametric  
299 two-tailed test (57). Enrichment between counts per groups were tested using a 2x2 Fisher's  
300 exact test.

301

## 302 **RESULTS**

303

304 *The Dpse AcgP*. A *Dpse AcgP* was constructed from peptide-based (“bottom-up”) shotgun  
305 MS/MS spectral data obtained from eight independent runs consisting of four replicate  
306 samples from each of two *Dpse* experimental sexual selection populations. For the purposes  
307 of assembling a proteome with the broadest coverage, data from all runs were pooled together  
308 resulting in a total of 3757 UniProt IDs that mapped to 3281 unique FlyBase gene names. The  
309 M- and P- datasets were highly correlated with >90% (3534/3757) overlap (Figure 1A).  
310 Likewise, proteins with values in all four replicates for each PCSS treatment represented the  
311 majority of identified proteins (M-line 2103/3649; 57.6% and P-line, 2235/3642; 61.4%) A  
312 complete listing and tabulation of these results can be found in Supplemental Table S1. The  
313 small number of proteins unique to each population (M-unique = 115; P-unique = 108; Figure

314 1A) most likely represent missed protein assignments due to low quantities (as measured by  
315 total spectral counts). Indeed, the average total spectral counts for the unique set of proteins  
316 (ave. 4.5; n = 223) was 16-fold lower than the average across the entire dataset (ave. 72.8, n  
317 = 3874).

318

### 319 GO and pathway analysis of the AcgP

320 Pathway and functional analyses began by identifying orthologous Dmel genes, (3159/3281,  
321 96.2%; Supplemental Table 1), providing a useful annotated database to evaluate the overall  
322 patterns of the functional elements in the AcgP. As an overview of the major GO groupings,  
323 Blast2Go returned "signaling", "reproduction" and "localization" among BP- and numerous  
324 proteins annotated as extracellular involved in the CC-categories, respectively (Supplemental  
325 Figure 2). Statistical analysis for GO category enrichment (Figure 2) identified BP terms  
326 related to intracellular transport (n = 363, P = 2.80E-45), translation (n = 257, P = 2.47E-35),  
327 establishment of protein localization (n= 418, P = 1.22E-44), vesicle-mediated transport (n=  
328 301, P = 8.47E-42), endocytosis (n = 106, P = 7E-10), and secretion (n = 140, P = 2.71E-16).  
329 Likewise, the AcgP contains a significant number of proteins in CC categories annotated as  
330 "extracellular region" (n = 266, P = 3.2E-05), "endomembrane system" (n = 583, P = 1.04E-  
331 57) and "vesicle" (n = 230, P = 8.72E-25). Finally, the overall known biochemical pathways of  
332 the AcgP, analyzed using the Kyoto Encyclopedia of Genes and Genomes (KEGG), revealed  
333 a similar enrichment of 20 overview terms curated by KEGG that included ribosome  
334 biogenesis, protein export, endocytosis and the Wnt signaling pathways (Table 1). We  
335 conclude the AcgP contains features expected of a metabolically active cell enriched for  
336 protein production and protein secretion. See Supplemental Table 2 for a complete listing of  
337 all enriched GO categories.

338

339 The *Dpse* accessory gland secretome (AcgS). Signal peptides are a ubiquitous class of short  
340 (20-22 aa) N-terminal sequences, that target proteins for translocation across, and into, the  
341 endomembrane system of the cell (58, 59). Collectively proteins containing signal peptide

342 sequences are considered part of the secretory pathway, and a subclass - those secreted into  
343 the extracellular space - are termed the secretome (also referred to as the exoproteome,  
344 exoP). Therefore, some or all components of the exoP can be considered as candidate SFPs.  
345 Given the secretory nature of the *Drosophila* accessory gland, we therefore queried the AcgP  
346 for proteins containing canonical signal sequences using two predictive programs, SignalP  
347 and Phobius (see Methods). SignalP (39) is a neural network-based algorithm designed to  
348 detect canonical N-terminal signal sequences and discriminate against N-terminal  
349 transmembrane regions known to reduce predictive power, and Phobius utilizes a combined  
350 model of both transmembrane and signal peptide predictors (40, 60). The combined output of  
351 both resulted in 771 Uniprot IDs that mapped to 535 Dpse FBgns (Figure 1B; Supplemental  
352 Table 3). Dmel orthologs (OrthoDB via Flybase) subsequently returned 506 Dmel orthologs to  
353 the Dpse AcgS including a small percentage (8/511, 1.6%) of "1:many" matches included in  
354 the analysis to capture the greatest proteome coverage of the secretome. Thus, the AcgS  
355 represents approximately 15% (535/3281; 16.3%) of the entire AcgP consistent with similar  
356 calculations for the predicted human secretome (~15%,  
357 <http://www.proteinatlas.org/humanproteome/secretome>). Finally, the DRSC Integrative  
358 Ortholog Prediction Tools (DIOPT) website (<http://www.flyrnai.org/diopt>) identified 61%  
359 (327/535) of the AcgS that corresponded to orthologous human sequences (Supplemental  
360 Table 3).

361

### 362 Gene Ontology (GO) Functional Analysis of the AcgS

363 The high degree of homology between the Dpse AcgS genes and Dmel (506/528),  
364 Supplemental Table 3) provided a putative orthologous secretome useful for GO analysis and  
365 network visualization. A significant enrichment in BP terms was observed, many related to  
366 multicellular organism reproduction (n=113, p=7E-7), reproduction (n=116, p=7E-7), behavior  
367 (n=53, p=2.1E-5 and proteolysis (n=66, p=3.5E-6). The secretome is enriched in MF terms  
368 related to oxidoreductase activity (n=55, p=7.1E-7) and hydrolase activity (n=138, p=8.5e-14;  
369 see Supplemental Table 3 for a complete list of all AcgS enriched BP, CC and MF GO

370 categories). We also examined the subcellular localization of the AcgS using the Cerebral  
371 layout tool implemented in Cytoscape. As expected for functions related to secretion and  
372 proteins containing signal sequences targeted to the secretory pathway, the predicted  
373 subcellular localization of AcgS proteins were skewed toward extracellular and plasma  
374 membrane proteins (Figure 3).

375

#### 376 *The AcgS contains a robust repertoire of putative SFPs*

377 We used the AcgS to identify a list of 151 putative SFPs representing >25% (151/506) of the  
378 AcgS (Figure 1B; Supplemental Table 4). This list is a conservative estimate as 99 genes had  
379 no CC functional annotation. Cytoscape and Cluego network analyses returned enriched BP  
380 terms of major functional categories including, insemination, sperm competition, and  
381 copulation reproduction, and negative regulation of endopeptidase activity (Table 2;  
382 Supplemental Table 4). Compared with a list of 212 Dmel SFPs assembled from the literature  
383 (9, 20, 21) an overlap of 32.1% (68/212) was observed that included 32 named SFP genes  
384 including Acp53Ea, Acp53C14d and Acp53C14c (Supplemental Table 4).

385

#### 386 *Divergent sexual selection results in differential AcgP protein abundance*

387 To examine the proteome-wide response to sexual selection, differential protein abundance  
388 between the M- and P-lines was determined. A total of 250 differentially abundant Uniprot  
389 entries were identified using LFQ and Qspec statistical analysis across both treatments (FDR  
390 < 1%). The Uniprot IDs were subsequently mapped to 229 orthologous Dmel proteins  
391 (Supplemental Table 5). Taken together, network visualization of all 229 differentially  
392 abundant proteins revealed tight clustering of GO terms grouped into processes related to the  
393 cytoskeleton, protein translational machinery- particularly ribosomal proteins- and a suite of  
394 amino-acyl tRNA synthetases, along with a significant enrichment in categories related to  
395 endomembrane systems (e.g., Golgi, ER) and elements of the secretory pathway associated  
396 with vesicles and the Golgi apparatus (Figure 4A). Moreover, 14.4% (33/229) of the  
397 differentially abundant proteins were members of the exoP, including known Acps

398 (Supplemental Table 6).

399

400 *M- and P-line differential protein abundance*

401 To further probe the effect of PCSS on our divergent selection lines, we defined differential  
402 protein abundance between the sexual selection treatments based according to the sign of  
403 the log-fold change relative to the M-line (i.e., positive fold-change,  $M < P$ ; negative fold-  
404 change,  $M > P$ ; Supplemental Table 5). Of the 229 differentially abundant proteins, 133 and  
405 96 were more abundant in the M-line in the P-line, respectively (Figure 1C). To examine  
406 differences in the function and cellular location of proteins differentially abundant between the  
407 M- and P-lines, the overlap of the two with respect to their GO groupings was generated using  
408 Cytoscape and Cluego. This comparison revealed a striking separation of functional grouping,  
409 with each selection line showing unique sub-groupings within the overall network of functional  
410 annotations (Figure 4B). We found differentially abundant proteins related to translational  
411 machinery (e.g., ribosomes) and cytoskeleton groupings predominant within the P-line (Figure  
412 4B, green) with bias toward cytoplasmic cellular activities whereas Golgi- and vesicle- related  
413 groupings (including the exoP) biased in the M-line (Figure 4B, red) and functioning near or at  
414 the cell periphery.

415

416 Thirty-three of the differentially abundant proteins (24 up in M, 9 up in P) were annotated as  
417 "extracellular" (i.e., putative SFPs; Supplemental Table 6). While a larger number of candidate  
418 SFPs were more abundant in M-line compared to P-line males, over 50% of P abundant SFPs  
419 overlapped with known Dmel SFPs (5/9) compared to 29% overlap between M abundant and  
420 Dmel SFPs (7/24). Differentially abundant P male proteins did not show significant GO BP  
421 enrichment whereas significant enrichment was found in M-line males related to "response to  
422 fungus" ( $P = 2.1E-02$ ) and "wound healing" ( $P = 2.0E-02$ ) (9/24, 34.5%; Supplemental Table  
423 6; Supplemental Figure 3).

424

425 *Sexual selection targets protein interaction networks*



426 While the differentially abundant proteins of each selection line was biased towards distinct  
427 sets of GO functional groupings (Figure 4B), we also tested whether these relationships  
428 extended to specific protein interaction networks of known network topologies. We used the  
429 most stringent filters for network interactions on STRING (45), and found a statistically  
430 significant ( $P = 0.001$ ) PPI network of 91 proteins containing nine defined subnetworks and  
431 including elements of 34 KEGG pathways (Supplemental Table 7). A striking aspect of the  
432 STRING-generated PPI networks was the almost complete segregation of M and P  
433 differentially abundant proteins into line-specific protein interaction networks (Figure 5). For  
434 example, all elements of the “vesicle transport” and “purine biosynthesis” PPI networks were  
435 more abundant exclusively in the M-line. Likewise, all proteins under “microtubule  
436 organization” and almost all (15/18) in the “ribosome” category are more abundant in the P-  
437 line. These results show that the divergent sexual selection treatments used to generate the  
438 M- and P-lines resulted in highly focused and interrelated changes in protein abundance that  
439 were specific to each treatment.

440

#### 441 *Molecular evolutionary rates of accessory gland protein genes*

442 We tested for rates of molecular evolution in male reproductive proteins by estimating omega  
443 ( $dN/dS$  substitution rates) for each set of proteins: candidate SFPs, secretome proteins  
444 (minus SFPs), and the remaining accessory gland proteome proteins using orthologs from two  
445 closely related species in the obscura group, *D. lowei* and *D. affinis*. We found that putative  
446 Dpse SFPs (Exoproteome) are evolving faster than both accessory gland proteome proteins  
447 (AcgP; median omega = 0.088 versus 0.052,  $P = E-09$ ) and accessory gland secretome minus  
448 the Exoproteome (AcgS; median omega = 0.088 versus 0.078,  $P = 2.7E-02$ ; Figure 6A). AcgS  
449 proteins also evolve faster than the AcgP proteins (median omega = 0.052 versus 0.078,  $P =$   
450  $1 \times 10^{-9}$ ; Figure 6A).

451

452 Given that sexual selection is hypothesized to result in rapid protein sequence evolution, we  
453 then compared the evolutionary rates of the selection-specific differentially abundant proteins

454 and accessory gland proteins (excluding selection-specific proteins). We found that the P  
455 treatment showed pronounced reduction in dN compared to the M treatment (Figure 6B,  
456 dN=0.009 (P) versus 0.018 (M), P=0.011). This is perhaps unsurprising considering that  
457 cytosolic ribosomal proteins are highly enriched in P, a protein group that has been shown to  
458 be slowly evolving (61). However, slowly evolving genes may be indicative of intensified  
459 selective pressures which obscure signals of positive selection, so to account for this we  
460 employed a direct site-specific test of positive selection across the accessory gland proteome.  
461 We identified 19 proteins that showed positive selection, 14 from the AcgP and 5 showing  
462 differential abundance in the selection lines, 3 in P and 2 in M (Table 3). An enrichment  
463 analysis shows that genes encoding proteins that were differentially abundant following  
464 experimental microevolution were more likely to be under positive selection than those in the  
465 AcgP set (Figure 6C, Supplemental Table 8) after correction for multiple testing and this is  
466 significant for the P-only set as well.

467

## 468 DISCUSSION

### 469 *Proteomics of the Dpse male accessory gland*

470 The main aim of this work was to directly test the role of postcopulatory sexual selection in the  
471 evolution of reproductive proteins and the male accessory gland reproductive protein network.  
472 To accomplish this aim, we employed a “bottom up” shotgun proteomics approach, generating  
473 a robust accessory gland proteome containing 3281 proteins, representing the first accessory  
474 gland proteome to be described in *Drosophila*. The AcgP proteins in *Dpse* were enriched for  
475 cellular components expected from a tissue whose primary function is secretory, including  
476 several cellular component GO terms related to membranes, extracellular regions, and  
477 peptidase complex. The top biological process GO terms clearly indicated a large investment  
478 in processes directly and indirectly related to protein synthesis, protein assembly, transport  
479 and secretion. We then *in silico* concatenated this list to include proteins with secretory signal  
480 sequences to identify 545 accessory gland secretome proteins, which were enriched for GO

481 terms related to the biological processes of reproduction, behavior and proteolysis, with these  
482 proteins heavily biased towards subcellular localizations in the plasma member or extracellular  
483 components, as predicted from proteins with secretory signals.

484

485 *Candidate Dpse SFPs contains many known Dmel SFPs*

486 SFPs are secreted from the accessory gland tissue and transferred to the females upon  
487 mating. To generate a list of putative SFPs, we restricted the AcgS to only those proteins that  
488 were associated with GO cellular component annotations containing the keyword  
489 “extracellular”. The list of these proteins is most probably conservative as not all proteins were  
490 annotated. Nonetheless, the approach identified 151 proteins enriched for biological  
491 processes associated with reproduction, mating, insemination, and sperm competition, with  
492 approximately 30% that shared homology with previously identified Dmel SFPs. We also  
493 compared our list with the 29 putative SFPs previously identified via genome comparison  
494 between Dmel and Dpse (9). Of the nearly 50% overlap between these two lists (14/29),  
495 protein members of the canonical Sex Peptide (SP) network are particularly well-represented.  
496 In Dmel, SP binds to sperm in the female seminal receptacle, a sperm storage organ, and is  
497 required for both long-term female resistance to remating and for sperm release from storage  
498 (62). Our list of SFPs contains several known proteins involved in the Dmel SP network,  
499 including the gene duplicate pair lectins CG1652 and CG1656, aquarius (CG14061), intrepid  
500 (CG12558), antares (CG30488), seminase (CG10586), CG17575 (a cysteine-rich secretory  
501 protein), and CG9997 (a serine protease homolog) (16). CG9997 is processed in the female  
502 and males that do not produce this protein are unable to transfer the lectins, which are required  
503 to slow the rate at which CG9997 is processed in the female. All SP pathway proteins, except  
504 SP, were detected in our putative list of SFPs. Absence of detectable Dpse SP protein is  
505 consistent with the lack of a recognized SP ortholog in this species, and raises the interesting  
506 possibility that either the Dpse SP ortholog has significantly diverged, or has been replaced  
507 by another gene. If indeed a bona fide Dpse SP gene exists, further MS searches using

508 algorithms to detect amino acid replacements (63) may be useful in the search for this elusive  
509 SFP.

510

511 *Functional compartmentalization results from divergent sexual selection*

512 While our analysis found many known SFPs, 68% had no known orthology to Dmel This  
513 supports the idea that SFPs and related proteins involved in reproduction show rapid evolution  
514 as suggested by genome comparisons (9, 16, 17, 21, 64–66) and experimental evolution  
515 research on changes in sex-specific gene expression (32, 33, 67). Here we directly measured,  
516 using LC-MS/MS and LFQ, the proteome-wide effect of postcopulatory sexual selection on  
517 protein abundance in two populations that had undergone over 150 generations of divergent  
518 PCSS. This approach identified significant protein abundance differences in over 200 proteins  
519 between the selection lines. Knowledge of the changes in protein abundance under these  
520 experimental conditions provided a useful database to compare and contrast the effects of  
521 selection from a proteome-wide perspective and to assess the impact of selection on the  
522 protein-protein interaction networks revealed by our analysis.

523

524 Previous comparative work has suggested protein evolution may be adaptively  
525 compartmentalized for core processes and undergoing purifying selection and for interactive  
526 proteins that undergo positive selection (24, 26). We directly tested this assertion by  
527 comparing protein interaction network architecture in the divergent PCSS treatments and  
528 testing for molecular signatures of selection. We found remarkably line-specific  
529 compartmentalized changes to proteins after more than 150 generations of experimental  
530 sexual selection. P males invest in protein production machinery (i.e., protein quantity) and M  
531 males invest in protein surveillance (i.e., protein quality). The number of matings a *Drosophila*  
532 male can have is limited by SFP supply and how rapidly males can replenish this supply (68).  
533 Moreover, males can respond plastically to increased risk of sperm competition by transferring  
534 more of some SFPs to females (14, 69). We have previously shown that P males have larger

535 accessory glands and can mate with more females sequentially than M males (30, 31). The  
536 increased investment in protein production machinery in P males may underlie this phenotypic  
537 response, and we suggest this may explain how males in polyandrous mating systems can  
538 rapidly adjust and replenish SFP quantity. In contrast, M males overall have increased  
539 production of proteins that function in downstream processing of secreted proteins, suggestive  
540 of increased investment in protein quality. The transfer of high quality proteins to females may  
541 be a response to reduce sexual conflict and improve population fitness, as predicted under  
542 enforced monogamy in which the reproductive interests of the sexes become aligned.

543 The SFPs produced in larger quantities in M compared to P males were enriched for chitin  
544 catabolic process (including wound healing) and response to fungus. Mating in *Dmel* initiates  
545 an immune response in females that has negative fitness consequences (70). The immune  
546 system may be activated to combat pathogens in the ejaculate and/or immunogenic sperm  
547 and SFPs (response to fungus), and/or wounds inflicted by males (chitin catabolic processes  
548 and wound healing). As enforced monogamy relaxes sexual conflict between males and  
549 females, M males may produce more of these proteins to limit damage to their mates. Future  
550 work could test this by manipulating these protein levels in the male ejaculate and determining  
551 the consequences on female fitness following mating. M males also produced more  
552 ejaculatory bulb protein (Ebp; CG2668), a known constituent of the mating plug. The mating  
553 plug remains in the female uterus until females eject it, along with unstored sperm. Ebp is  
554 necessary for ejaculate retention; knocking down Ebp in *Dmel* results in ejaculate loss, and  
555 reduced female sperm storage (Avila et al. 2015b). M males may produce more Ebp for better  
556 ejaculate retention, reducing the likelihood of their mates requiring additional matings to  
557 maintain sperm stores and subsequent fertility. Given the costs of mating for females, such a  
558 response is predicted when sexual conflict is relaxed, as in the M treatment.

559 Differentially abundant P male proteins did not show significant GO BP enrichment but over  
560 50% of these (5/9) are known *Dmel* SFPs. This includes another mating plug protein,  
561 Acp53C14b, known to be involved in egg laying and reproductive fitness (71). Our previous

562 work on the Dpse selection lines described sexual conflict over female reproductive  
563 phenology; M females mated to P males oviposit more eggs earlier in their lifespan than when  
564 mated to their own males (31). Given that the M treatment removes sexual conflict, alterations  
565 to the M female oviposition schedule when mated to P males is likely to be costly. This  
566 manipulation of female oviposition may be mediated by Acp53C14b given that this protein –  
567 which P males produce more of - influences oviposition.

#### 568 *Rates of molecular evolution on male reproductive proteins*

569 Rapid evolution at the molecular level is common for reproductive proteins including SFPs  
570 (e.g., (10, 18, 22, 26)) and this rapid evolution at the macroevolutionary scale is attributed to  
571 PCSS. Here we go beyond these traditional tests and ask whether there are differences in the  
572 rate of evolution between different types of reproductive proteins arising from the same tissue  
573 at the microevolutionary scale following over 150 generations of experimental manipulation of  
574 PCSS. We find that genes encoding SFPs showed significantly faster rates of molecular  
575 evolution compared to both other secreted protein encoding genes that were not candidate  
576 SFPs and overall accessory gland proteome genes. However, we also found that secretome  
577 genes showed higher rates of molecular evolution than non-secreted proteins (i.e., the  
578 remainder of the AcpP). These results support the interpretation that genes which interact  
579 extracellularly evolve more rapidly than those that remain within the cytoplasm (72, 73).

580 Evolutionary rates of genes encoding differentially abundant proteins between the sexual  
581 selection treatments found pronounced reduction in dN of P males compared to either  
582 differentially abundant proteins in M or the AcpP. This was likely due to the  
583 compartmentalization we identified, in which P males invested more in slowly evolving  
584 cytosolic ribosomal proteins (Barreto and Burton 2013). However, after controlling for this, we  
585 found that genes encoding for M- and P- differentially abundant proteins were more likely to  
586 have been subjected to positive selection compared to the AcpP genes as a whole. This result  
587 reinforces the hypothesis that the proteins we identified as responding to divergent sexual

588 selection t the microevolutionary level have undergone adaptive processes on a  
589 macroevolutionary scale. We argue this directly illustrates a major role of PCSS in the  
590 evolution of male reproductive proteins.

591

## 592 *Conclusions*

593 By employing divergent postcopulatory sexual selection through the use of experimental  
594 evolution of mating systems, we were able to directly test the hypothesis that postcopulatory  
595 sexual selection results in the rapid evolution of male-specific reproductive proteins. Within  
596 150 generations, substantial microevolutionary changes occurred such as differential  
597 abundance of secreted proteins, including previously identified Dmel SFPs that have known  
598 effects on male and female reproductive fitness. A small number of these proteins showed  
599 signatures of positive molecular evolution. We found PCSS mediates remarkable  
600 compartmentalization of subcellular function of the secretory tissue, suggesting sexual  
601 selection alters fundamental reproductive protein networks, not just individual SFPs. These  
602 changes affected protein production, but in different ways in the divergent treatments,  
603 suggesting that PCSS selects for increased protein production whereas as relaxation of sexual  
604 conflict selects for protein surveillance. Some specific changes may be related to previously  
605 described phenotypic responses to divergent sexual selection that facilitate greater  
606 reproductive capacity in males subject to polyandry and ameliorates sexual conflict in  
607 populations subject to monandry. Our novel results suggest wide-spread, previously  
608 unappreciated, consequences of postcopulatory sexual selection on reproductive protein  
609 evolution. Combining the increasing use of high throughput proteomics and experimental  
610 manipulation of mating systems in different taxa will allow broader tests of this pattern in  
611 different taxa and better understanding of how sexual selection and sexual conflict impacts  
612 male reproductive protein evolution.

613 *Acknowledgements* – We thank the many people who have contributed to the maintenance of  
614 the Snook experimental evolution lines. Funding of the experimental evolution lines came from

615 NSF (DEB-0093149), NERC (NE/B504065/1; NE/I014632/1), and EU (ITN-2008-213780  
616 SPECIATION) to RRS. Funding and technical support for the proteomic work came from the  
617 University of Sheffield Biological Mass Spectrophotometry Facility (funded by Yorkshire  
618 Cancer Research (Shend01) and the Wellcome Trust). TIG was supported by a Leverhulme  
619 Early Career Fellowship (Grant ECF-2015-453) and a NERC grant (NE/N013832/1). Funding  
620 from the Kyoto Institute of Technology to TLK also supported this research.

621

#### 622 DATA AVAILABILITY

623 Raw files for the entire datasets used in this study have been deposited via ProteomeXchange  
624 on the PRIDE database repository.

625

626

#### 627 REFERENCES

- 628 1. Snook, R. R. (2014) The evolution of polyandry. *The Evolution of Insect Mating*  
629 *Systems* 159-180
- 630 2. Arnqvist, G. and Rowe, L. (2005) *Sexual conflict*, Princeton University Press,  
631 Princeton, N.J.
- 632 3. Birkhead, T. R., Hosken, D. J. and Pitnick, S. S. (2008) Sperm Biology.
- 633 4. Avila, F. W., Sirot, L. K., LaFlamme, B. A., Rubinstein, C. D. and Wolfner, M. F. (2011)  
634 Insect seminal fluid proteins: identification and function. *Annual review of entomology* **56**, 21-  
635 40
- 636 5. Ramm, S. A., McDonald, L., Hurst, J. L., Beynon, R. J. and Stockley, P. (2009)  
637 Comparative proteomics reveals evidence for evolutionary diversification of rodent seminal  
638 fluid and its functional significance in sperm competition. *Mol Biol Evol* **26**, 189-198
- 639 6. Dorus, S., Evans, P. D., Wyckoff, G. J., Choi, S. S. and Lahn, B. T. (2004) Rate of  
640 molecular evolution of the seminal protein gene SEMG2 correlates with levels of female  
641 promiscuity. *Nat Genet* **36**, 1326-1329
- 642 7. Harrison, P. W., Wright, A. E., Zimmer, F., Dean, R., Montgomery, S. H., Pointer, M.



- 643 A. and Mank, J. E. (2015) Sexual selection drives evolution and rapid turnover of male gene  
644 expression. *Proc Natl Acad Sci U S A* **112**, 4393-4398
- 645 8. Panhuis, T. M., Clark, N. L. and Swanson, W. J. (2006) Rapid evolution of reproductive  
646 proteins in abalone and *Drosophila*. *Philosophical transactions of the Royal Society of London*  
647 *B: Biological sciences* **361**, 261-268
- 648 9. Mueller, J. L., Ravi Ram, K., McGraw, L. A., Bloch Qazi, M. C., Siggia, E. D., Clark, A.  
649 G., Aquadro, C. F. and Wolfner, M. F. (2005) Cross-species comparison of *Drosophila* male  
650 accessory gland protein genes. *Genetics* **171**, 131-143
- 651 10. Clark, N. L., Aagaard, J. E. and Swanson, W. J. (2006) Evolution of reproductive  
652 proteins from animals and plants. *Reproduction* **131**, 11-22
- 653 11. Mattei, A. L., Riccio, M. L., Avila, F. W. and Wolfner, M. F. (2015) Integrated 3D view  
654 of postmating responses by the *Drosophila melanogaster* female reproductive tract, obtained  
655 by micro-computed tomography scanning. *Proceedings of the National Academy of Sciences*  
656 *of the United States of America* **112**, 8475-8480
- 657 12. Avila, F. W. and Wolfner, M. F. (2009) Acp36DE is required for uterine conformational  
658 changes in mated *Drosophila* females. *Proceedings of the National Academy of Sciences of*  
659 *the United States of America* **106**, 15796-15800
- 660 13. Perry, J. C., Sirot, L. and Wigby, S. (2013) The seminal symphony: How to compose  
661 an ejaculate. *Trends in Ecology and Evolution* **28**, 414-422
- 662 14. Wigby, S., Sirot, L. K., Linklater, J. R., Buehner, N., Calboli, F. C. F., Bretman, A.,  
663 Wolfner, M. F. and Chapman, T. (2009) Seminal fluid protein allocation and male reproductive  
664 success. *Current biology : CB* **19**, 751-757
- 665 15. Avila, F. W., Mattei, A. L. and Wolfner, M. F. (2015) Sex peptide receptor is required  
666 for the release of stored sperm by mated *Drosophila melanogaster* females. *Journal of insect*  
667 *physiology* **76**, 1-6
- 668 16. Findlay, G. D., Sitnik, J. L., Wang, W., Aquadro, C. F., Clark, N. L. and Wolfner, M. F.  
669 (2014) Evolutionary rate covariation identifies new members of a protein network required for  
670 *Drosophila melanogaster* female post-mating responses. *PLoS Genetics* **10**, e1004108

- 671 17. Swanson, W. J., Clark, A. G., Waldrip-Dail, H. M., Wolfner, M. F. and Aquadro, C. F.  
672 (2001) Evolutionary EST analysis identifies rapidly evolving male reproductive proteins in  
673 *Drosophila*. *Proceedings of the National Academy of Sciences of the United States of America*  
674 **98**, 7375-7379
- 675 18. Mueller, J. L., Ripoll, D. R., Aquadro, C. F. and Wolfner, M. F. (2004) Comparative  
676 structural modeling and inference of conserved protein classes in *Drosophila* seminal fluid.  
677 *Proceedings of the National Academy of Sciences of the United States of America* **101**, 13542-  
678 13547
- 679 19. Wagstaff, B. J. and Begun, D. J. (2005) Comparative genomics of accessory gland  
680 protein genes in *Drosophila melanogaster* and *D. pseudoobscura*. *Mol Biol Evol* **22**, 818-832
- 681 20. Findlay, G. D., MacCoss, M. J. and Swanson, W. J. (2009) Proteomic discovery of  
682 previously unannotated, rapidly evolving seminal fluid genes in *Drosophila*. *Genome research*  
683 **19**, 886-896
- 684 21. Findlay, G. D., Yi, X., Maccoss, M. J. and Swanson, W. J. (2008) Proteomics reveals  
685 novel *Drosophila* seminal fluid proteins transferred at mating. *PLoS Biol* **6**, e178
- 686 22. Wilburn, D. B. and Swanson, W. J. (2016) From molecules to mating: Rapid evolution  
687 and biochemical studies of reproductive proteins. *J Proteomics* **135**, 12-25
- 688 23. Schumacher, J., Rosenkranz, D. and Herlyn, H. (2014) Mating systems and protein-  
689 protein interactions determine evolutionary rates of primate sperm proteins. *Proc Biol Sci* **281**,  
690 20132607
- 691 24. Dorus, S., Wasbrough, E. R., Busby, J., Wilkin, E. C. and Karr, T. L. (2010) Sperm  
692 proteomics reveals intensified selection on mouse sperm membrane and acrosome genes.  
693 *Molecular biology and evolution* **27**, 1235-1246
- 694 25. Dorus, S., Busby, S. A., Gerike, U., Shabanowitz, J., Hunt, D. F. and Karr, T. L. (2006)  
695 Genomic and functional evolution of the *Drosophila melanogaster* sperm proteome. *Nature*  
696 *genetics* **38**, 1440-1445
- 697 26. Vicens, A., Borziak, K., Karr, T. L., Roldan, E. R. S. and Dorus, S. (2017) Comparative  
698 Sperm Proteomics in Mouse Species with Divergent Mating Systems. *Mol Biol Evol* **34**, 1403-

699 1416

700 27. Athanasios, A., Charalampos, V., Vasileios, T. and Ashraf, G. M. (2017) Protein-  
701 Protein Interaction (PPI) Network: Recent Advances in Drug Discovery. *Curr Drug Metab* **18**,  
702 5-10

703 28. Levy, E. D. and Pereira-Leal, J. B. (2008) Evolution and dynamics of protein  
704 interactions and networks. *Curr Opin Struct Biol* **18**, 349-357

705 29. Crudgington, H. S., Beckerman, A. P., Brustle, L., Green, K. and Snook, R. R. (2005)  
706 Experimental removal and elevation of sexual selection: Does sexual selection generate  
707 manipulative males and resistant females? *American Naturalist* **165**, S72-S87

708 30. Crudgington, H. S., Fellows, S. and Snook, R. R. (2010) Increased opportunity for  
709 sexual conflict promotes harmful males with elevated courtship frequencies. *Journal of*  
710 *evolutionary biology* **23**, 440-446

711 31. Crudgington, H. S., Fellows, S., Badcock, N. S. and Snook, R. R. (2009) Experimental  
712 manipulation of sexual selection promotes greater male mating capacity but does not alter  
713 sperm investment. *Evolution; international journal of organic evolution* **63**, 926-938

714 32. Immonen, E., Snook, R. R. and Ritchie, M. G. (2014) Mating system variation drives  
715 rapid evolution of the female transcriptome in *Drosophila pseudoobscura*. *Ecology and*  
716 *evolution* **4**, 2186-2201

717 33. Veltsos, P., Fang, Y., Cossins, A. R., Snook, R. R. and Ritchie, M. G. (2017) Mating  
718 system manipulation and the evolution of sex-biased gene expression in *Drosophila*. *Nat*  
719 *Commun* **8**, 2072

720 34. Anderson, W. W. (1974) Frequent multiple insemination in a natural population of  
721 *Drosophila pseudoobscura*. *The American naturalist* **108**, 709-711

722 35. Snook, R. R., Brüstle, L. and Slate, J. (2009) A test and review of the role of effective  
723 population size on experimental sexual selection patterns. *Evolution; international journal of*  
724 *organic evolution* **63**, 1923-1933

725 36. Snook, R. R. and Markow, T. A. (2002) Efficiency of gamete usage in nature: sperm  
726 storage, fertilization and polyspermy. *Proceedings. Biological sciences / The Royal Society*

727 **269**, 467-473

728 37. Nesvizhskii, A. I., Keller, A., Kolker, E. and Aebersold, R. (2003) A Statistical Model for  
729 Identifying Proteins by Tandem Mass Spectrometry abilities that proteins are present in a  
730 sample on the basis. *Analytical chemistry* **75**, 4646-4658

731 38. Kriventseva, E. V., Tegenfeldt, F., Petty, T. J., Waterhouse, R. M., Simão, F. A.,  
732 Pozdnyakov, I. A., Ioannidis, P. and Zdobnov, E. M. (2015) OrthoDB v8: update of the  
733 hierarchical catalog of orthologs and the underlying free software. *Nucleic Acids Res* **43**,  
734 D250-6

735 39. Petersen, T. N., Brunak, S., von Heijne, G. and Nielsen, H. (2011) SignalP 4.0:  
736 discriminating signal peptides from transmembrane regions. *Nature methods* **8**, 785-786

737 40. Käll, L., Krogh, A. and Sonnhammer, E. L. (2004) A combined transmembrane  
738 topology and signal peptide prediction method. *J Mol Biol* **338**, 1027-1036

739 41. Cline, M. S., Smoot, M., Cerami, E., Kuchinsky, A., Landys, N., Workman, C.,  
740 Christmas, R., Avila-Campilo, I., Creech, M., Gross, B., Hanspers, K., Isserlin, R., Kelley, R.,  
741 Killcoyne, S., Lotia, S., Maere, S., Morris, J., Ono, K., Pavlovic, V., Pico, A. R., Vailaya, A.,  
742 Wang, P.-L., Adler, A., Conklin, B. R., Hood, L., Kuiper, M., Sander, C., Schmulevich, I.,  
743 Schwikowski, B., Warner, G. J., Ideker, T. and Bader, G. D. (2007) Integration of biological  
744 networks and gene expression data using Cytoscape. *Nature protocols* **2**, 2366-2382

745 42. Demchak, B., Hull, T., Reich, M., Liefeld, T., Smoot, M., Ideker, T. and Mesirov, J. P.  
746 (2014) Cytoscape: the network visualization tool for GenomeSpace workflows.  
747 *F1000Research* **3**, 151

748 43. Bindea, G., Mlecnik, B., Hackl, H., Charoentong, P., Tosolini, M., Kirilovsky, A.,  
749 Fridman, W.-H., Pagès, F., Trajanoski, Z. and Galon, J. (2009) ClueGO: A Cytoscape plug-in  
750 to decipher functionally grouped gene ontology and pathway annotation networks.  
751 *Bioinformatics (Oxford, England)* **25**, 1091-1093

752 44. Bindea, G., Galon, J. and Mlecnik, B. (2013) CluePedia Cytoscape plugin: pathway  
753 insights using integrated experimental and in silico data. *Bioinformatics* **29**, 661-663

754 45. Szklarczyk, D., Franceschini, A., Wyder, S., Forslund, K., Heller, D., Huerta-Cepas, J.,

- 755 Simonovic, M., Roth, A., Santos, A., Tsafo, K. P., Kuhn, M., Bork, P., Jensen, L. J. and von  
756 Mering, C. (2015) STRING v10: protein-protein interaction networks, integrated over the tree  
757 of life. *Nucleic Acids Res* **43**, D447-52
- 758 46. Choi, H., Fermin, D. and Nesvizhskii, A. I. (2008) Significance Analysis of Spectral  
759 Count Data in Label-free Shotgun Proteomics. *Molecular & Cellular Proteomics* **7**, 2373-2385
- 760 47. Choi, H., Kim, S., Fermin, D., Tsou, C. C. and Nesvizhskii, A. I. (2015) QPROT:  
761 Statistical method for testing differential expression using protein-level intensity data in label-  
762 free quantitative proteomics. *J Proteomics* **129**, 121-126
- 763 48. Blein-Nicolas, M. and Zivy, M. (2016) Thousand and one ways to quantify and compare  
764 protein abundances in label-free bottom-up proteomics. *Biochimica et biophysica acta* **1864**,  
765 883-895
- 766 49. Palmieri, N., Kosiol, C. and Schlötterer, C. (2014) The life cycle of Drosophila orphan  
767 genes. *Elife* **3**, e01311
- 768 50. Altschul, S. F., Gish, W., Miller, W., Myers, E. W. and Lipman, D. J. (1990) Basic local  
769 alignment search tool. *J Mol Biol* **215**, 403-410
- 770 51. Gossmann, T. I., Santure, A. W., Sheldon, B. C., Slate, J. and Zeng, K. (2014) Highly  
771 variable recombinational landscape modulates efficacy of natural selection in birds. *Genome*  
772 *Biol Evol* **6**, 2061-2075
- 773 52. Edgar, R. C. (2004) MUSCLE: multiple sequence alignment with high accuracy and  
774 high throughput. *Nucleic Acids Res* **32**, 1792-1797
- 775 53. Wu, M., Chatterji, S. and Eisen, J. A. (2012) Accounting for alignment uncertainty in  
776 phylogenomics. *PLoS One* **7**, e30288
- 777 54. Suyama, M., Torrents, D. and Bork, P. (2006) PAL2NAL: robust conversion of protein  
778 sequence alignments into the corresponding codon alignments. *Nucleic Acids Res* **34**, W609-  
779 12
- 780 55. Yang, Z. (2007) PAML 4: phylogenetic analysis by maximum likelihood. *Mol Biol Evol*  
781 **24**, 1586-1591
- 782 56. Hochberg, Y. and Benjamini, Y. (1990) More powerful procedures for multiple

- 783 significance testing. *Stat Med* **9**, 811-818
- 784 57. Mann, H. B. and Whitney, D. R. (1947) On a Test of Whether One of Two Random  
785 Variables Is Stochastically Larger Than the Other. *Ann. Math. Statistics* **18**, 50-60
- 786 58. Armengaud, J., Christie-Oleza, J. A., Clair, G., Malard, V. and Duport, C. (2012)  
787 Exoproteomics: exploring the world around biological systems. *Expert Rev Proteomics* **9**, 561-  
788 575
- 789 59. Tjalsma, H., Bolhuis, A., Jongbloed, J. D., Bron, S. and van Dijk, J. M. (2000) Signal  
790 peptide-dependent protein transport in *Bacillus subtilis*: a genome-based survey of the  
791 secretome. *Microbiology and molecular biology reviews : MMBR* **64**, 515-547
- 792 60. Käll, L., Krogh, A. and Sonnhammer, E. L. (2007) Advantages of combined  
793 transmembrane topology and signal peptide prediction--the Phobius web server. *Nucleic  
794 Acids Res* **35**, W429-32
- 795 61. Barreto, F. S. and Burton, R. S. (2013) Evidence for compensatory evolution of  
796 ribosomal proteins in response to rapid divergence of mitochondrial rRNA. *Mol Biol Evol* **30**,  
797 310-314
- 798 62. Avila, F. W., Ravi Ram, K., Bloch Qazi, M. C. and Wolfner, M. F. (2010) Sex peptide  
799 is required for the efficient release of stored sperm in mated *Drosophila* females. *Genetics*  
800 **186**, 595-600
- 801 63. Starkweather, R., Barnes, C. S., Wyckoff, G. J. and Keightley, J. A. (2007) Virtual  
802 polymorphism: finding divergent peptide matches in mass spectrometry data. *Anal Chem* **79**,  
803 5030-5039
- 804 64. Clark, N. L. and Swanson, W. J. (2005) Pervasive adaptive evolution in primate  
805 seminal proteins. *PLoS Genet* **1**, e35
- 806 65. Dean, M. D., Clark, N. L., Findlay, G. D., Karn, R. C., Yi, X., Swanson, W. J., MacCoss,  
807 M. J. and Nachman, M. W. (2009) Proteomics and comparative genomic investigations reveal  
808 heterogeneity in evolutionary rate of male reproductive proteins in mice (*Mus domesticus*).  
809 *Mol Biol Evol* **26**, 1733-1743
- 810 66. Sirot, L. K., Findlay, G. D., Sitnik, J. L., Frasher, D., Avila, F. W. and Wolfner, M. F.

- 811 (2014) Molecular characterization and evolution of a gene family encoding both female- and  
812 male-specific reproductive proteins in *Drosophila*. *Molecular biology and evolution* **31**, 1554-  
813 1567
- 814 67. Hollis, B., Houle, D., Yan, Z., Kawecki, T. J. and Keller, L. (2014) Evolution under  
815 monogamy feminizes gene expression in *Drosophila melanogaster*. *Nat Commun* **5**, 3482
- 816 68. Linklater, J. R., Wertheim, B., Wigby, S. and Chapman, T. (2007) Ejaculate depletion  
817 patterns evolve in response to experimental manipulation of sex ratio in *Drosophila*  
818 *melanogaster*. *Evolution* **61**, 2027-2034
- 819 69. Sirot, L. K., Wolfner, M. F. and Wigby, S. (2011) Protein-specific manipulation of  
820 ejaculate composition in response to female mating status in *Drosophila melanogaster*.  
821 *Proceedings of the National Academy of Sciences of the United States of America* **108**, 9922-  
822 9926
- 823 70. Mack, P. D., Kapelnikov, A., Heifetz, Y. and Bender, M. (2006) Mating-responsive  
824 genes in reproductive tissues of female *Drosophila melanogaster*. *Proc Natl Acad Sci U S A*  
825 **103**, 10358-10363
- 826 71. Avila, F. W., Cohen, A. B., Ameerudeen, F. S., Duneau, D., Suresh, S., Mattei, A. L.  
827 and Wolfner, M. F. (2015) Retention of Ejaculate by *Drosophila melanogaster* Females  
828 Requires the Male-Derived Mating Plug Protein PEBme. *Genetics* **200**, 1171-1179
- 829 72. Feyertag, F., Berninsone, P. M. and Alvarez-Ponce, D. (2017) Secreted Proteins Defy  
830 the Expression Level-Evolutionary Rate Anticorrelation. *Mol Biol Evol* **34**, 692-706
- 831 73. Liao, B. Y., Weng, M. P. and Zhang, J. (2010) Impact of extracellularity on the  
832 evolutionary rate of mammalian proteins. *Genome Biol Evol* **2**, 39-43
- 833
- 834

835 Figure Legends

836

837 Figure 1. Dpse accessory gland summary statistics. (A) Venn diagram of combined and total  
838 Uniprot IDs from the M- and P-experimental lines used to assemble the AcgP. (B) Secretome  
839 and exoproteome from the AcgP derived *in silico* (see Methods). (C) Differential protein  
840 abundance between the M- and P- experimental lines. Numbers in parentheses indicate Dmel  
841 orthologs from OrthoDB database.

842

843 Figure 2. AcgP GO category enrichment analysis. Distribution of major functional category  
844 groupings for Biological Process (A) and Cellular Component (B). Categories related to  
845 secretory processes and discussed in main text highlighted in bold.

846

847 Figure 3. Functional grouping and subcellular localizaton of the AcgS mapped to subcellular  
848 regions (labeled on the right) using the Cerebral layout in Cytoscape. Shaded regions show  
849 all annotations that include the keyword “Extracellular”.

850

851 Figure 4. Network and predicted cellular distribution of DE proteins. (A) Overview of the DE  
852 proteins (M- and P-lines combined) showing major enriched functional groupings for GO  
853 Cellular Components (CC) using Cytoscape and Cluego. The four major groups, cytoskeletal  
854 part, golgi part, translation machinery and endomembrane system are shaded with different  
855 background colors. Dashed line encloses two functionally distinct categories, the ribosome  
856 and tRNA synthetase complex of the translation machinery (see also Table 5). (B) Network  
857 comparison of functional annotation groupings between DE proteins of the M- and P-lines.  
858 DE proteins were segregated into their respective M- or P- lines based on relative protein  
859 abundance and both groups compared using Cluego. A heat map (red-to-green) shows the  
860 distribution of DE protein between the M- and P-lines. These distributions were then mapped  
861 onto the predicted cellular locations of the groupings using the Cluepedia and the Cerebral  
862 layout as implemented in Cytoscape.



863

864 Figure 5. PPI network representation of the M (red, M>P) and P (green, P>M) DE proteins  
865 (inset). The PPI network was generated using STRING, a program that determines protein-  
866 protein interactions based on experimental and database criteria and calculated confidence  
867 levels to assign interactions between protein pairs. Stippled lines indicate major functional  
868 categories describing the networks.

869

870 Figure 6. (A) Evolutionary rate calculations of the ratio of the non-synonymous to synonymous  
871 (dN/dS) substitution rates for (left to right) the Acg proteome (AcgP), the secretome (AcgS,  
872 excluding exoproteome and the exoproteome (AcgS-Extracellular). (B) The rate of  
873 nonsynonymous changes (dn) in genes coding for (left to right); the AcgP (minus DE M and P  
874 treatment genes), differentially abundant M-line genes (DE\_M\_UP) and differentially abundant  
875 P-line genes (DE\_P\_UP). Number of genes analyzed in each category listed below category.  
876 (C) Summary table of evolutionary rate analysis indicating significant enrichment of differential  
877 abundance proteins under positive selection.

Table 1. Enriched KEGG pathways of the AcgP.

| <i>GOID</i> | <i>GO Term</i>                             | <i>Nr. Genes</i> | <i>Pvalue*</i> |
|-------------|--------------------------------------------|------------------|----------------|
| KEGG:03008  | Ribosome biogenesis                        | 33               | 3.5E-12        |
| KEGG:03040  | Spliceosome                                | 82               | 8.0E-06        |
| KEGG:04141  | Processing in endoplasmic reticulum        | 82               | 5.9E-05        |
| KEGG:03018  | RNA degradation                            | 40               | 4.6E-04        |
| KEGG:03050  | Proteasome                                 | 35               | 5.5E-04        |
| KEGG:04144  | Endocytosis                                | 74               | 5.6E-04        |
| KEGG:04310  | Wnt signaling pathway                      | 24               | 1.8E-03        |
| KEGG:00071  | Fatty acid degradation                     | 24               | 2.9E-03        |
| KEGG:04130  | SNARE vesicular transport                  | 17               | 2.9E-03        |
| KEGG:00330  | Arginine and proline metabolism            | 34               | 4.6E-03        |
| KEGG:00230  | Purine metabolism                          | 40               | 1.0E-02        |
| KEGG:03060  | Protein export                             | 17               | 1.1E-02        |
| KEGG:00280  | Valine, leucine and isoleucine degradation | 22               | 1.3E-02        |
| KEGG:00250  | Ala, asp and glu metabolism                | 20               | 1.4E-02        |
| KEGG:00020  | Citrate cycle (TCA cycle)                  | 27               | 2.5E-02        |
| KEGG:00030  | Pentose phosphate pathway                  | 16               | 2.8E-02        |
| KEGG:04068  | FoxO signaling pathway                     | 16               | 2.9E-02        |
| KEGG:00500  | Starch and sucrose metabolism              | 20               | 4.2E-02        |
| KEGG:03010  | Ribosome                                   | 83               | 4.3E-02        |
| KEGG:03015  | mRNA surveillance pathway                  | 41               | 4.4E-02        |

\*Bonferroni Corrected

Table 2. Enriched BP categories of the AcgS exoproteome (putative SFPs).

| <i>BP Category</i>                            | <i>Nr. Genes</i> | <i>Pvalue*</i> |
|-----------------------------------------------|------------------|----------------|
| multicellular organism reproduction           | 77               | 7.5E-29        |
| insemination                                  | 11               | 2.8E-13        |
| drug catabolic process                        | 10               | 1.3E-06        |
| response to biotic stimulus                   | 20               | 7.3E-06        |
| lipid transport                               | 9                | 2.2E-05        |
| response to wounding                          | 8                | 1.9E-03        |
| negative regulation of catalytic activity     | 9                | 2.4E-03        |
| reproduction                                  | 78               | 3.3E-27        |
| multi-multicellular organism process          | 11               | 2.8E-13        |
| copulation                                    | 11               | 2.7E-12        |
| sperm competition                             | 10               | 5.6E-12        |
| regulation of female receptivity, post-mating | 9                | 2.0E-11        |
| regulation of female receptivity              | 9                | 1.7E-09        |
| female mating behavior                        | 9                | 2.0E-08        |
| response to external biotic stimulus          | 20               | 7.3E-06        |
| response to other organism                    | 20               | 7.3E-06        |
| carbohydrate derivative catabolic process     | 9                | 1.1E-05        |
| mating                                        | 12               | 4.5E-05        |
| reproductive behavior                         | 12               | 6.2E-05        |
| mating behavior                               | 11               | 9.4E-05        |
| response to bacterium                         | 13               | 5.5E-04        |
| lipid localization                            | 9                | 9.6E-04        |
| aminoglycan metabolic process                 | 8                | 2.5E-03        |
| negative regulation of molecular function     | 9                | 3.5E-03        |

\*Bonferonni corrected

Table 3

19 genes with site-specific test of positive selection (PAML; M7a vs M8a)

| <i>Dpse gene</i> | <i>Dpse FBgn ID</i> | <i>Dmel FBgn ID</i> | <i>Symbol name</i> | Diff Abundance† |
|------------------|---------------------|---------------------|--------------------|-----------------|
| <b>GA20754</b>   | FBgn0080745         | FBgn0262559         | Mdh2               | M-Up            |
| <b>GA16372</b>   | FBgn0076387         | FBgn0051659         | CG31659            | M-Up            |
| <b>GA13959</b>   | FBgn0073991         | FBgn0265434         | zip                | P-Up            |
| <b>GA18802</b>   | FBgn0078802         | FBgn0001098         | Gdh                | P-Up            |
| <b>GA19458</b>   | FBgn0079454         | FBgn0027582         | CG6230             | P-Up            |
| GA23027          | FBgn0244429         | FBgn0264078         | Flo2               |                 |
| GA16248          | FBgn0076264         | FBgn0038197         | foxo               |                 |
| GA14679          | FBgn0074706         | FBgn0027872         | rdgBbeta           |                 |
| GA10763          | FBgn0070819         | FBgn0033160         | Dhx15              |                 |
| GA11564          | FBgn0071615         | FBgn0037489         | CG1234             |                 |
| GA19689          | FBgn0079685         | FBgn0037842         | CG6567             |                 |
| GA20526          | FBgn0080520         | FBgn0261065         | Cpsf73             |                 |
| GA20026          | FBgn0080022         | FBgn0035121         | Tudor-SN           |                 |
| GA21237          | FBgn0081225         | FBgn0024238         | Fim                |                 |
| GA17987          | FBgn0077996         | FBgn0000299         | Col4a1             |                 |
| GA14182          | FBgn0074211         | FBgn0016075         | vkg                |                 |
| GA13434          | FBgn0073470         | FBgn0035533         | Cip4               |                 |
| GA16683          | FBgn0076698         | FBgn0052104         | CG32104            |                 |
| GA25309          | FBgn0246690         | ND*                 | ND                 |                 |

\* no ortholog found

†DA proteins (bold) from the indicated selection lines (M or P) with evidence of positive selection

**Figure 1****A**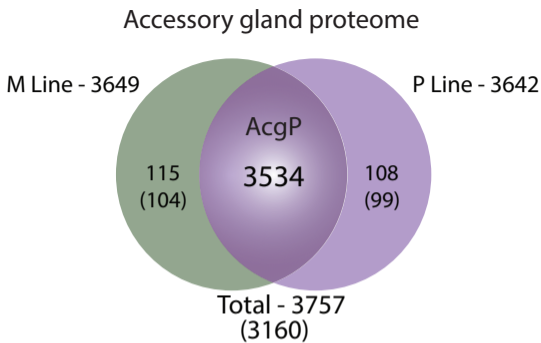**B**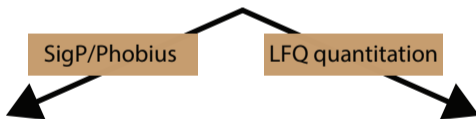**C**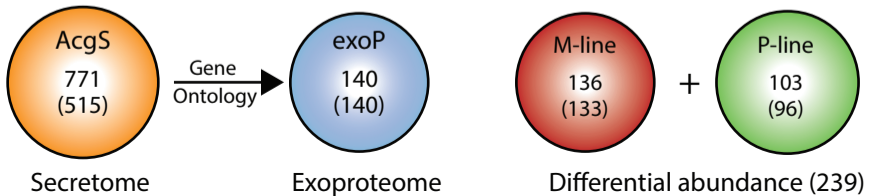

**Figure 2**

GO Category Enrichment (% terms per group)

**A**

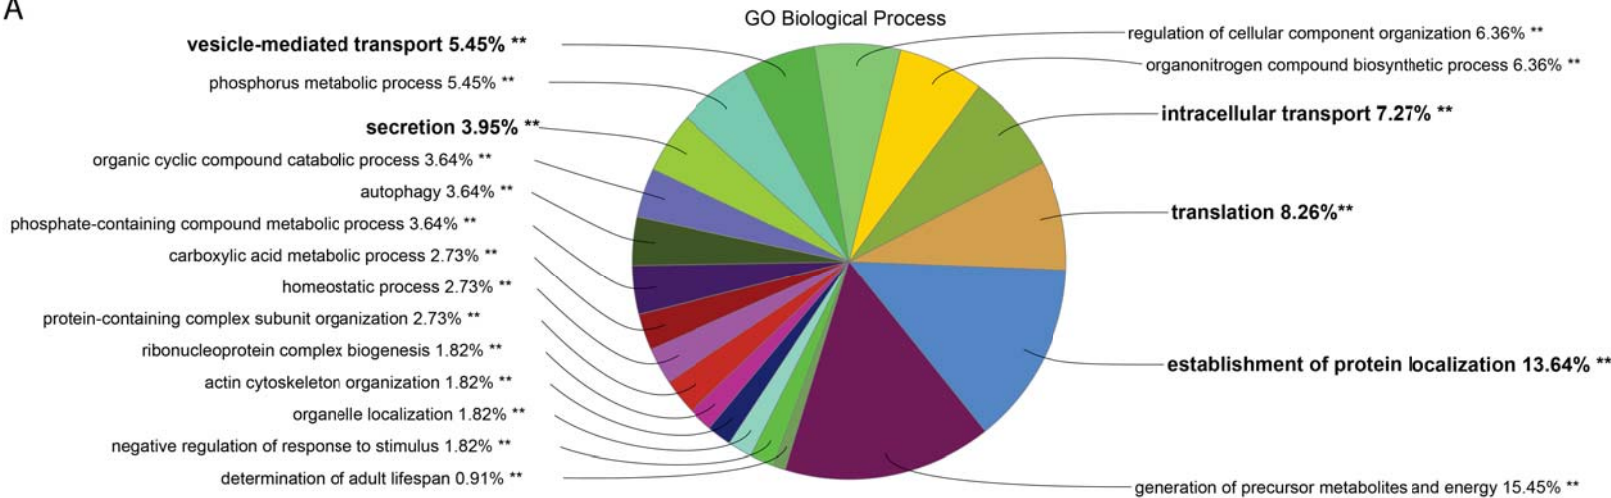

**B**

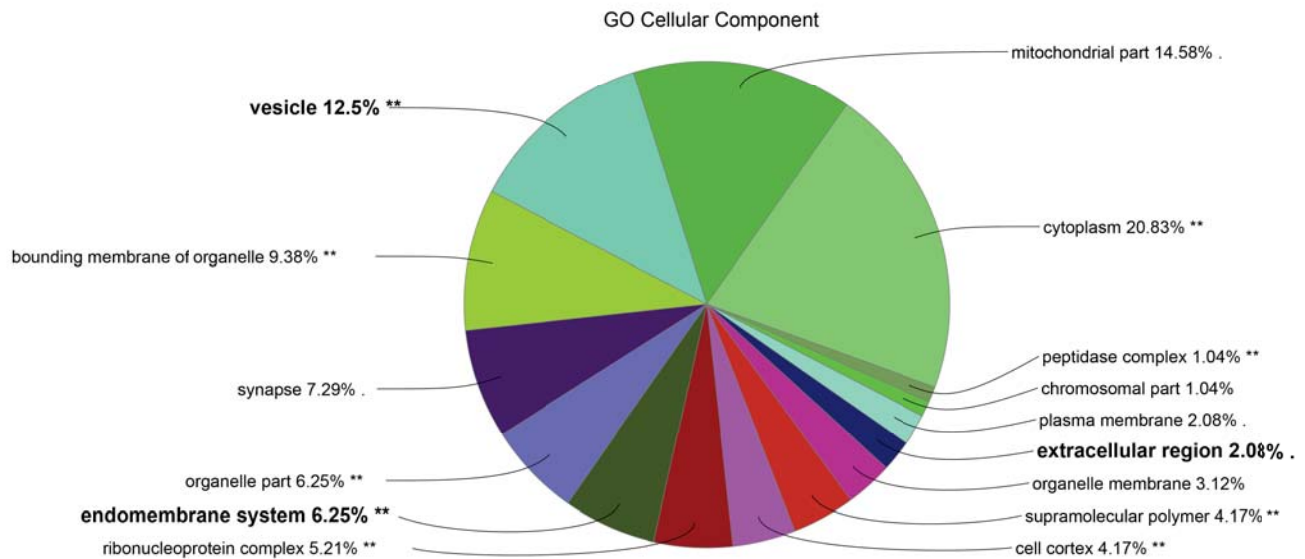

**Figure 3**

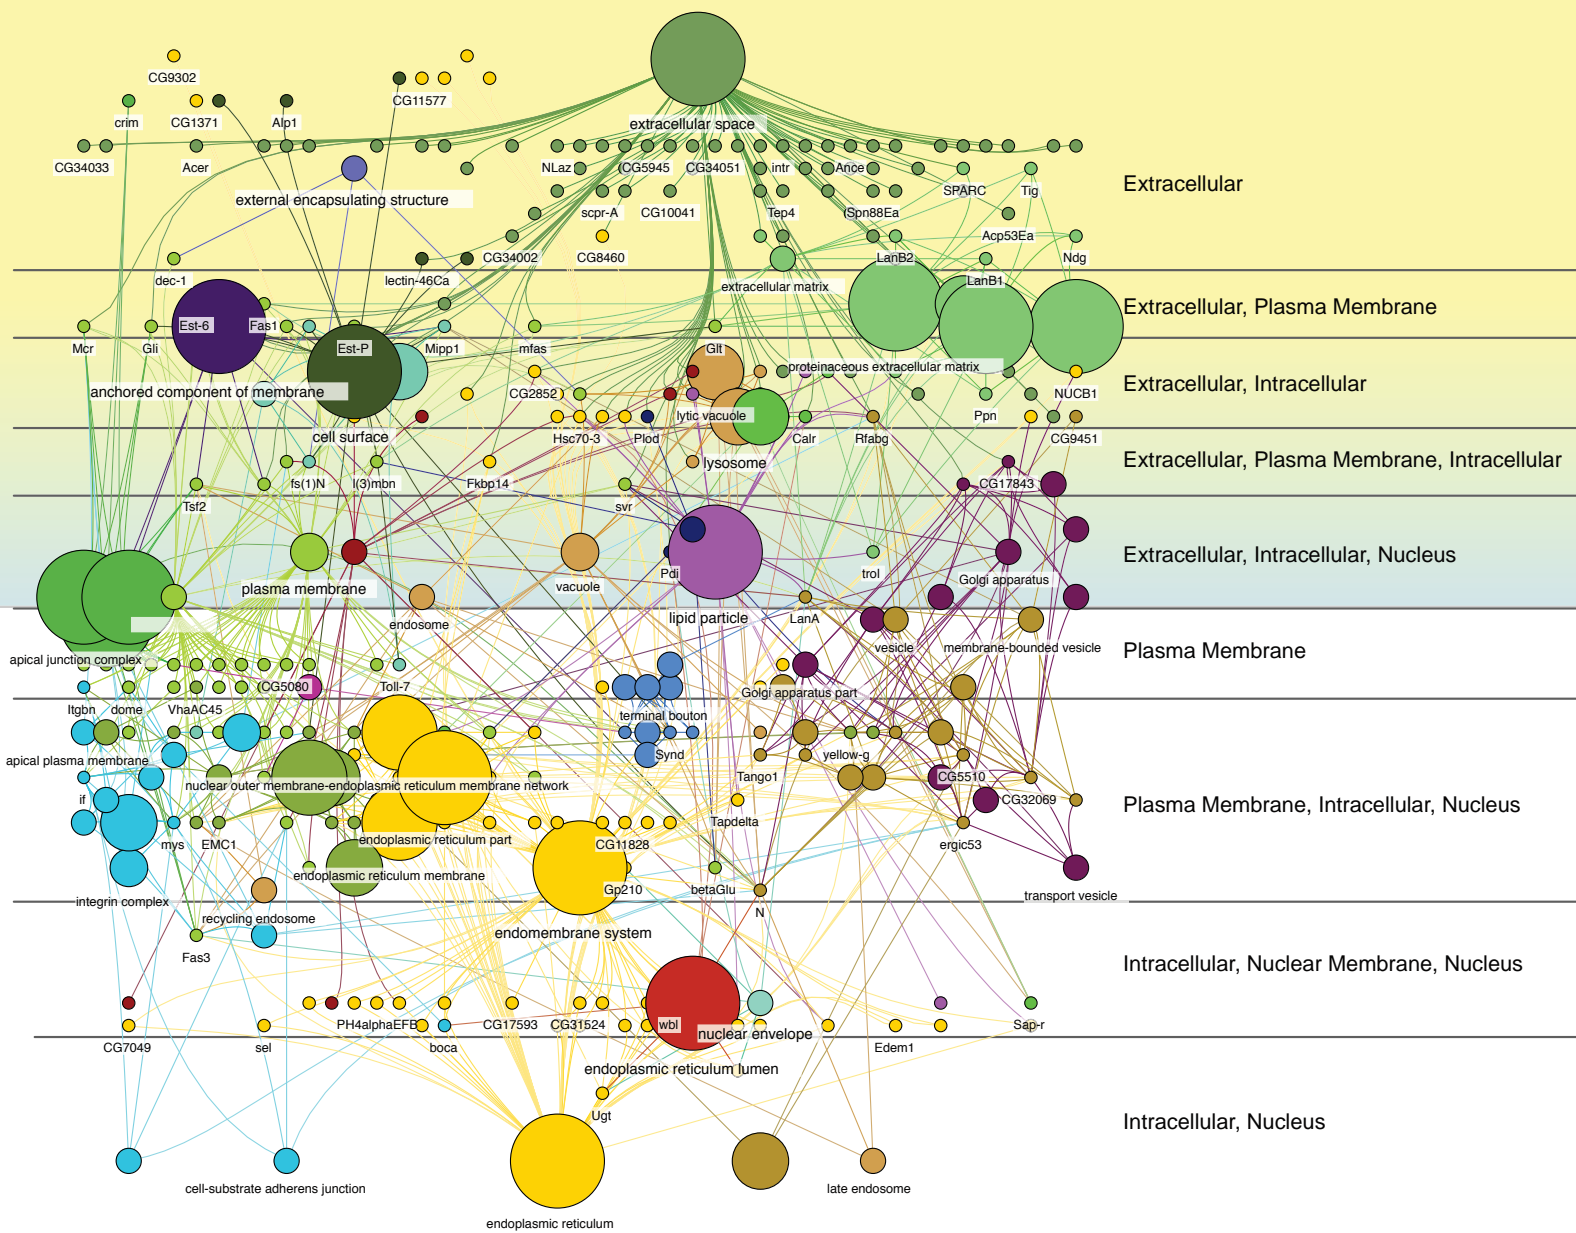

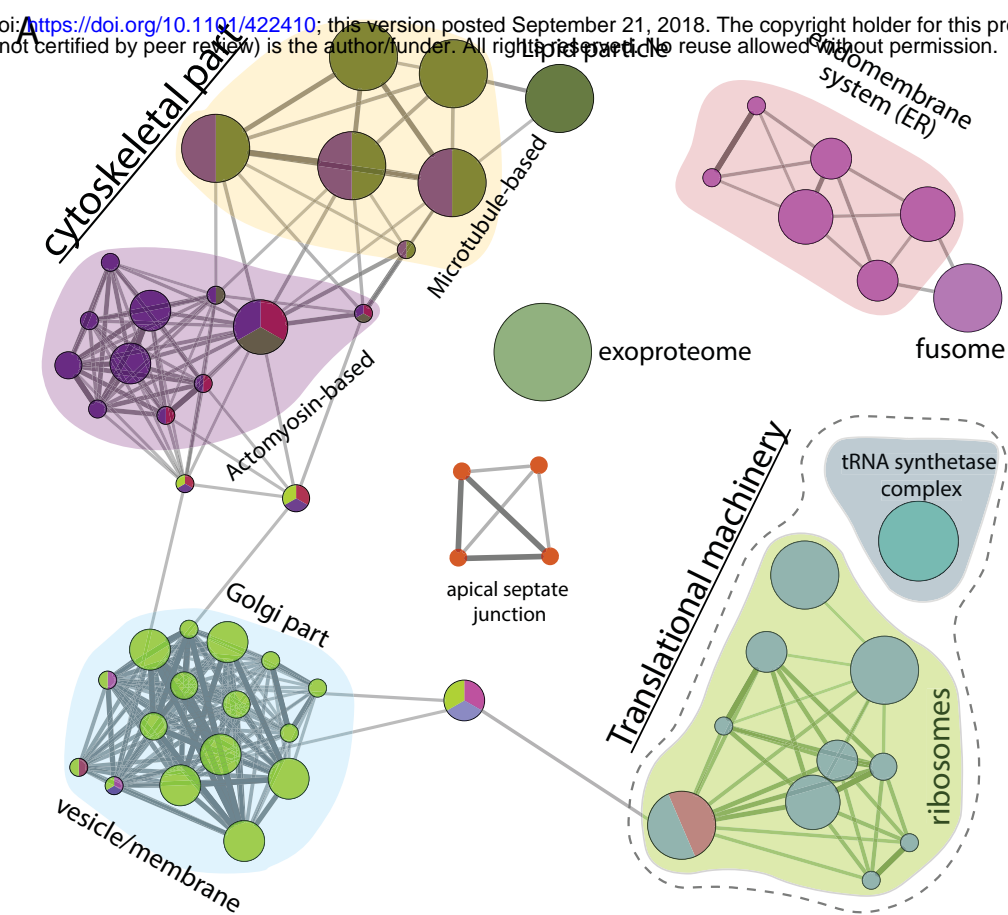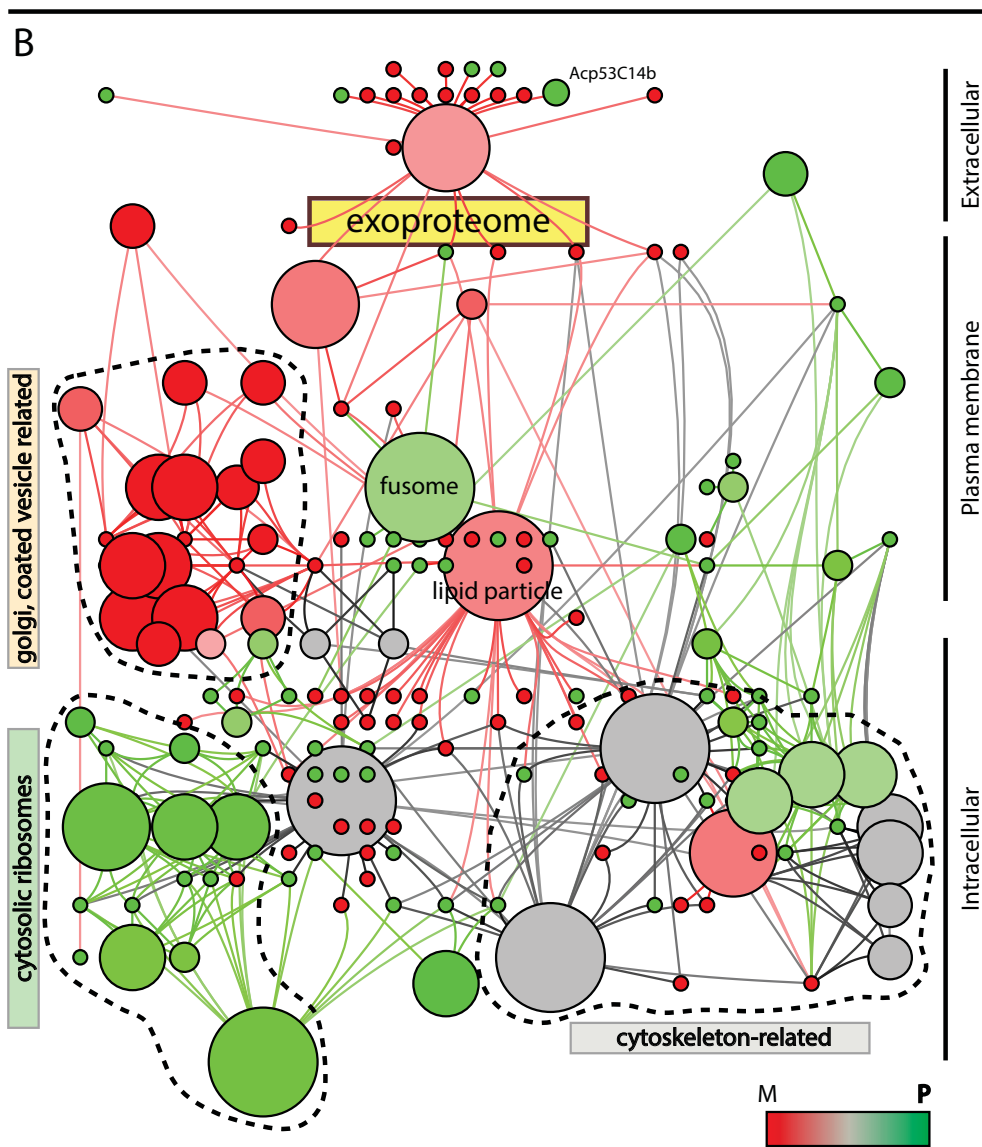



**Figure 5**

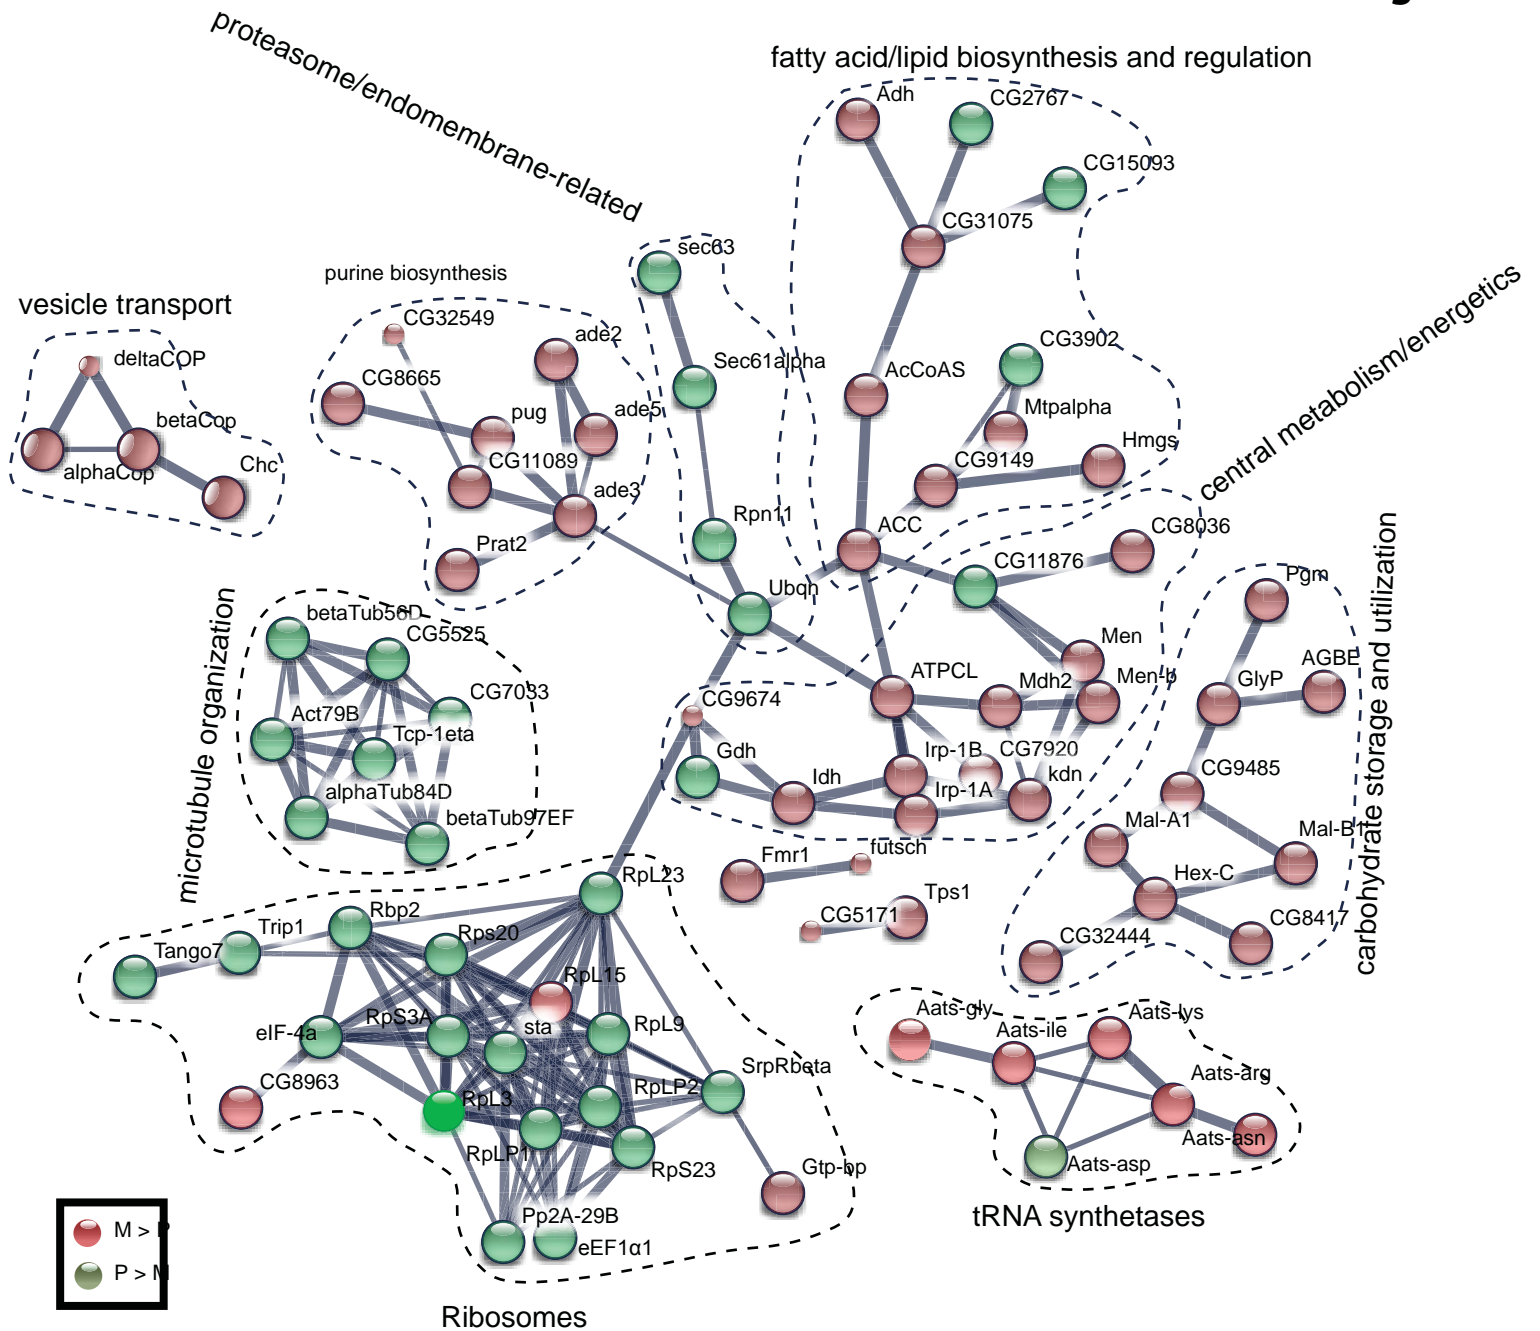

**Figure 6**

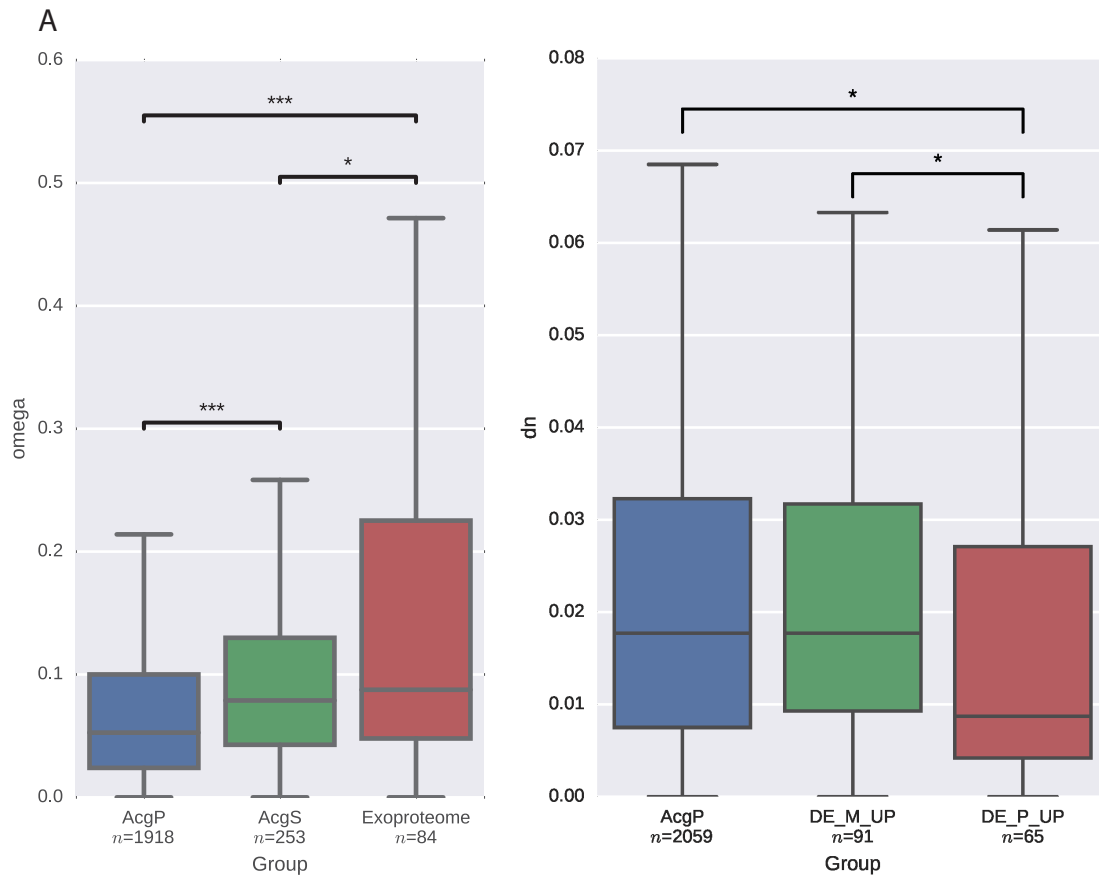

**C**

| Evolutionary Rate Analysis of Accessory Gland Proteome |                  |                  |           |
|--------------------------------------------------------|------------------|------------------|-----------|
| Protein Group                                          | (+)ive selection | no (+) selection | P-value * |
| AcgP                                                   | 14               | 2045             | NA        |
| P-line                                                 | 3                | 62               | 0.0137    |
| M-line                                                 | 2                | 89               | 0.1449    |
| M+P-line                                               | 5                | 151              | 0.0084    |

\* 2x2 Fisher's exact test (vs AcgP)
